# Supplementary material for: Impact of mammographic screening and advanced cancer definition on the percentage of advanced-stage cancers in a steady-state breast screening programme in the Netherlands
Source: PubMed Central journal article supplement (PMC7524754; doi:10.1038/s41416-020-0968-6), 2020-07-09
Supplement: 41416_2020_968_MOESM1_ESM.pdf [file 41416_2020_968_MOESM1_ESM.pdf]

**Supplementary Table 1.** Breast cancer characteristics within the screen-detected cancers after excluding the percentage of assumed overdiagnosis.

|                  | Screen-detected cancers |                   | Screen-detected cancers |  |
|------------------|-------------------------|-------------------|-------------------------|--|
|                  | 10% overdiagnosis       | 0% overdiagnosis* | 30% overdiagnosis       |  |
|                  | N (%)                   | N (%)             | N (%)                   |  |
| <b>Age</b>       |                         |                   |                         |  |
| - mean (IQR)     | 63 (58-68)              | 63 (58-68)        | 63 (57-68)              |  |
| 49-59            | 15,610 (33.4)           | 17,351 (33.4)     | 12,294 (33.8)           |  |
| 60-69            | 22,194 (47.5)           | 24,695 (47.6)     | 17,176 (47.3)           |  |
| 70-74            | 8,932 (19.1)            | 9,881 (19.0)      | 6,879 (18.9)            |  |
| <b>Year</b>      |                         |                   |                         |  |
| 2006             | 3,631 (7.8)             | 4,036 (7.8)       | 2,820 (7.8)             |  |
| 2007             | 3,976 (8.5)             | 4,444 (8.6)       | 3,151 (8.7)             |  |
| 2008             | 4,051 (8.7)             | 4,467 (8.6)       | 3,140 (8.6)             |  |
| 2009             | 4,127 (8.8)             | 4,577 (8.8)       | 3,282 (9.0)             |  |
| 2010             | 4,526 (9.7)             | 4,999 (9.6)       | 3,487 (9.6)             |  |
| 2011             | 4,850 (10.4)            | 5,369 (10.3)      | 3,707 (10.3)            |  |
| 2012             | 5,241 (11.2)            | 5,807 (11.2)      | 4,083 (11.2)            |  |
| 2013             | 5,490 (11.7)            | 6,141 (11.8)      | 4,262 (11.7)            |  |
| 2014             | 5,349 (11.4)            | 5,967 (11.5)      | 4,169 (11.5)            |  |
| 2015             | 5,493 (11.8)            | 6,120 (11.8)      | 4,248 (11.7)            |  |
| <b>SES</b>       |                         |                   |                         |  |
| High (8-9-10)    | 14,486 (31.0)           | 16,105 (31.0)     | 11,268 (31.0)           |  |
| Medium (4-5-6-7) | 18,681 (40.0)           | 20,800 (40.1)     | 14,521 (33.9)           |  |
| Low (1-2-3)      | 13,567 (29.0)           | 15,022 (28.9)     | 10,560 (29.1)           |  |
| Total            | 46,734 (100)            | 51,927 (100)      | 36,349 (100)            |  |

Abbreviations: IQR: interquartile range; SES: socioeconomic status

\* 0% overdiagnosis means that all patients are included in the analysis

**Supplementary Table 2.**

Percentage early- and advanced-stage disease of the remaining selection of screen-detected cancers after excluding the percentage of assumed overdiagnosis.

|                               | Screen-detected cancers |                   | Screen-detected cancers |  |
|-------------------------------|-------------------------|-------------------|-------------------------|--|
|                               | 10% overdiagnosis       | 0% overdiagnosis* | 30% overdiagnosis       |  |
|                               | N (%)                   | N (%)             | N (%)                   |  |
| <b>TNM-Stage</b>              |                         |                   |                         |  |
| Early-stage (St 0-I-II)       | 44,368 (95.1)           | 49,561 (95.6)     | 33,983 (93.7)           |  |
| Advanced-stage (St III- IV)   | 2,272 (4.9)             | 2,272 (4.4)       | 2,272 (6.3)             |  |
| Unknown                       | 94                      | 94                | 94                      |  |
| <b>NM-Stage</b>               |                         |                   |                         |  |
| Early-stage (N0M0)            | 35,391 (78.8)           | 40,584 (81.0)     | 25,006 (72.4)           |  |
| Advanced-stage (N+ and/or M+) | 9,514 (21.2)            | 9,514 (19.0)      | 9,514 (27.6)            |  |
| Unknown                       | 1,829                   | 1,829             | 1,829                   |  |
| <b>T-size</b>                 |                         |                   |                         |  |
| Early-stage (<15mm)           | 28,467 (62.4)           | 33,660 (66.3)     | 18,082 (51.3)           |  |
| Advanced-stage (≥15mm)        | 17,133 (37.6)           | 17,133 (33.7)     | 17,133 (48.7)           |  |
| Unknown                       | 1,134                   | 1,134             | 1,134                   |  |
| Total                         | 46,734 (100)            | 51,927 (100)      | 36,349 (100)            |  |

\* 0% overdiagnosis means that all patients are included

**Supplementary Figure 1.** Percentages of advanced breast cancers over time for two other definitions of advanced TNM-stage, compared to the main definition

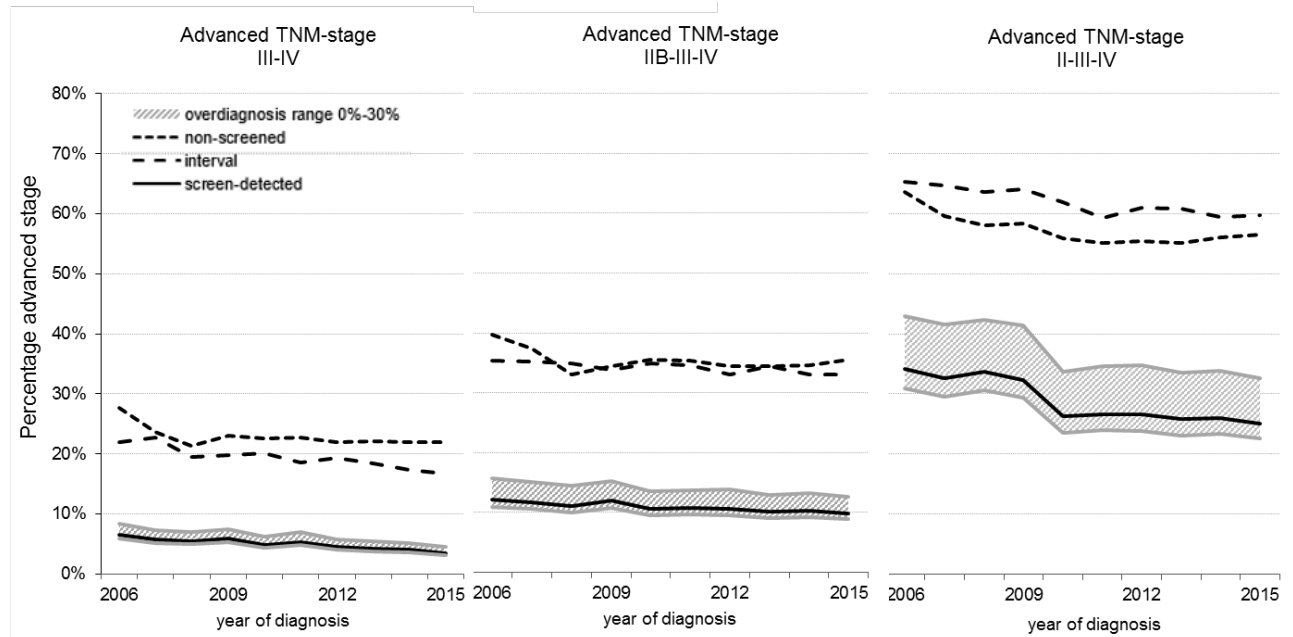

The solid line indicates the screen-detected cancers assuming 10% overdiagnosis. The shaded area then indicates the percentage assuming 0% overdiagnosis (lower limit) to 30% overdiagnosis (upper limit).

**Supplementary Figure 2.** Odds ratios for advanced breast cancer for two other definitions of advanced TNM-stage, compared to the main definition

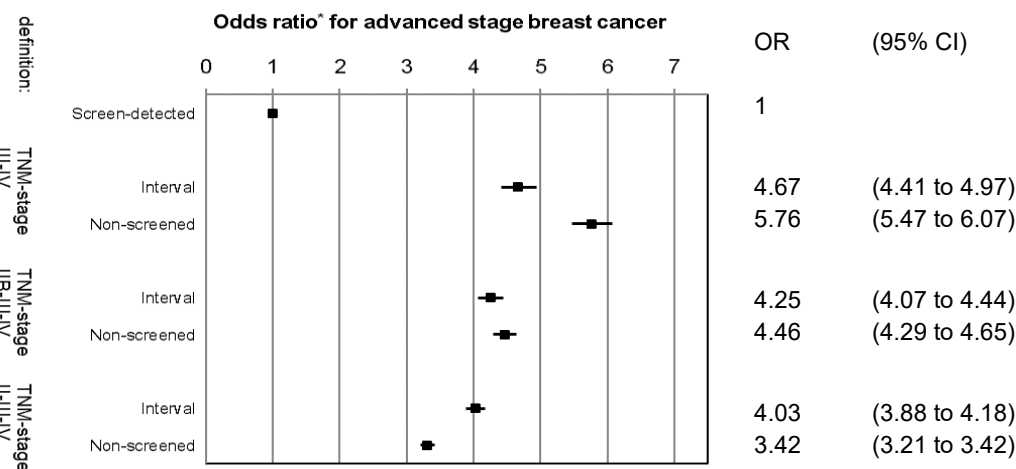

\* Multivariable analyses corrected for age, year of diagnosis, socioeconomic status  
Abbreviations: 95%CI: 95% Confidence interval

**Supplementary Figure 3.** Odds ratios for advanced breast cancer between different cohorts by three definitions of advanced stage, assuming 0%, no overdiagnosis

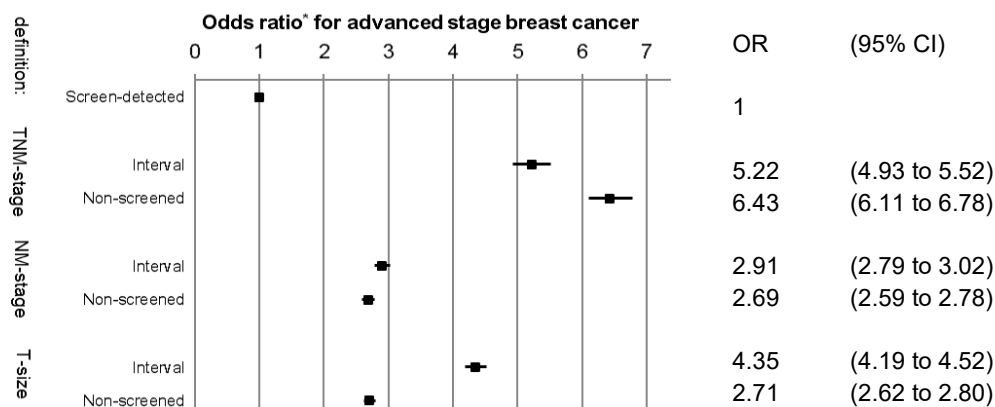

\* Multivariable analyses corrected for age, year of diagnosis, socioeconomic status  
Abbreviations: 95%CI: 95% Confidence interval

**Supplementary Figure 4.** Odds ratios for advanced breast cancer between different cohorts by three definitions of advanced stage, assuming 30% overdiagnosis#

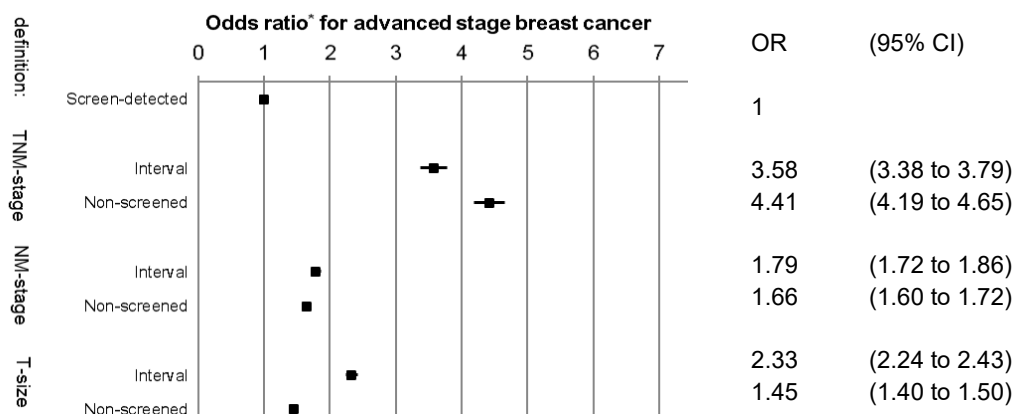

# 30% of all screen-detected cancers (n=51,927) were assumed to be overdiagnosed (n=15,578). As overdiagnosis occurs in the early screen-detected cancers by definition, we randomly excluded 15,578 cancers from the early screen-detected cancers as an attempt to correct for overdiagnosis.

\* Multivariable analyses corrected for age, year of diagnosis, socioeconomic status  
Abbreviations: 95%CI: 95% Confidence interval
